# Supplementary material
Source: Springer Nature journal article supplement (https://www.springermedizin.de/resource/supplementary/12943_2010_617_MOESM9_ESM.pdf/9554414)

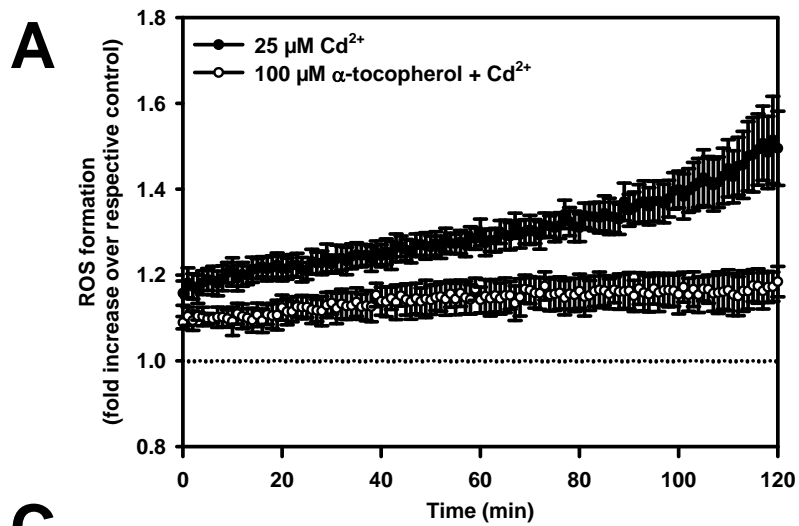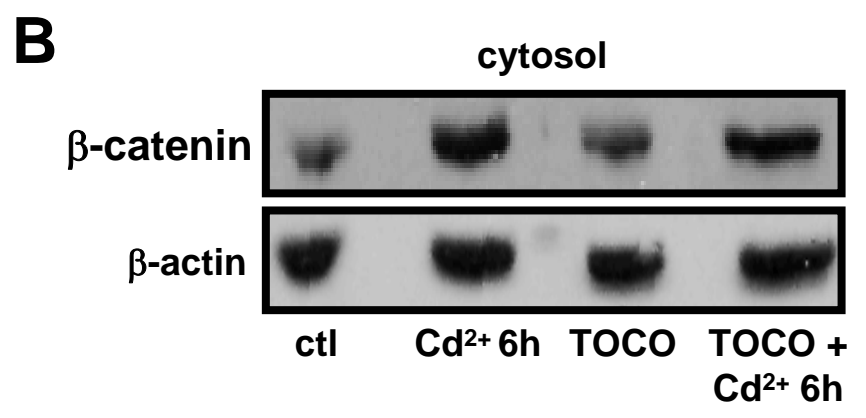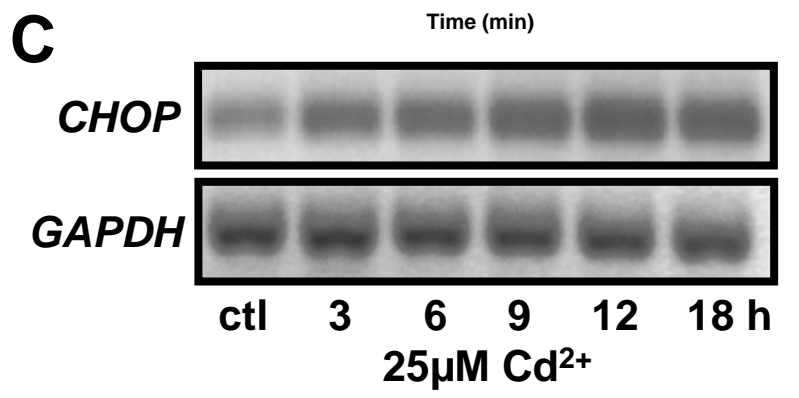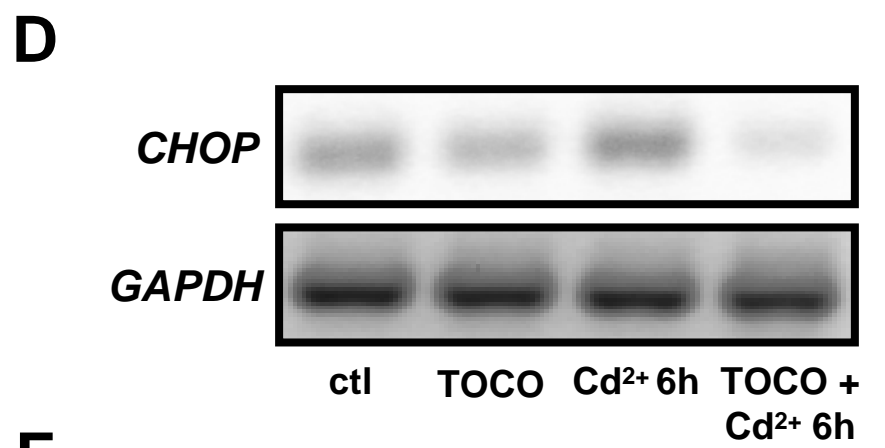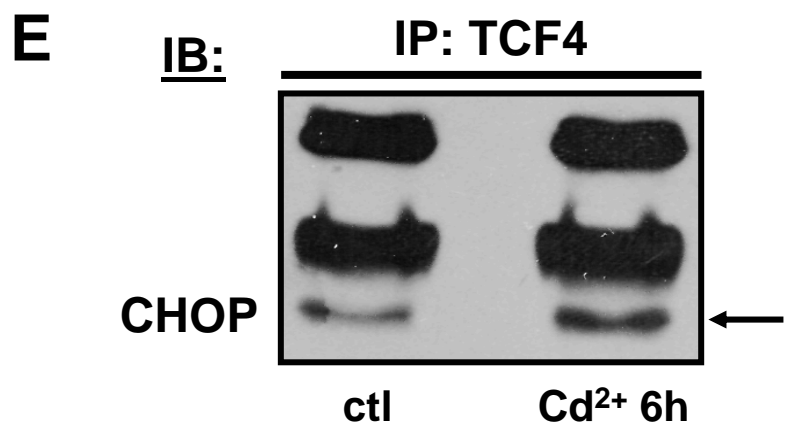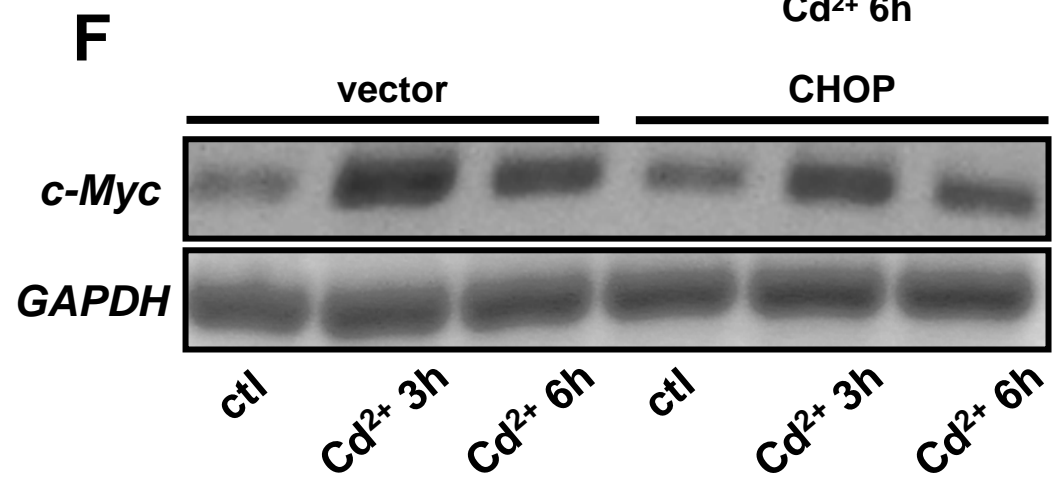

Supplement: MOESM9 [file 9554414]
